# Supplementary material for: Selective Styrene Oxidation Catalyzed by Phosphate Modified Mesoporous Titanium Silicate
Source: MDPI journal article supplement (doi:10.3390/chemistry5010042), 2023-03-10
Supplement: s1 [file s1]

Archive with 1 entries (1 files):
- chemistry-2244125-supplementary.pdf
