# Supplementary material for: Selective Styrene Oxidation Catalyzed by Phosphate Modified Mesoporous Titanium Silicate
Source: MDPI journal article supplement (doi:10.3390/chemistry5010042), 2023-03-10
Supplement: s1 [file s1 › chemistry-2244125-supplementary.pdf]

### Supporting Information

| Entry           | Table of Contents                                                                                                      | Page No    |
|-----------------|------------------------------------------------------------------------------------------------------------------------|------------|
| <b>Fig. S1</b>  | Small angle powder XRD data of SP-1.                                                                                   | <b>S2</b>  |
| <b>Fig. S2</b>  | FT-IR spectra of SP-1.                                                                                                 | <b>S3</b>  |
| <b>Fig. S3</b>  | Raman spectra of STP-1 sample.                                                                                         | <b>S4</b>  |
| <b>Fig. S4</b>  | Elemental mapping of STP-1.                                                                                            | <b>S5</b>  |
| <b>Fig. S5</b>  | FT-IR spectra of STP-1 catalyst after 5 catalytic cycle.                                                               | <b>S6</b>  |
| <b>Fig. S6</b>  | SEM image after 5 catalytic cycle.                                                                                     | <b>S7</b>  |
| <b>Fig. S7</b>  | GC-FID data of styrene oxidation reaction mixture after 1hr by STP-1 catalyst.                                         | <b>S8</b>  |
| <b>Fig. S8</b>  | GC-FID data of styrene oxidation reaction mixture after 2hr by STP-1 catalyst.                                         | <b>S8</b>  |
| <b>Fig. S9</b>  | GC-FID data of styrene oxidation reaction mixture after 5hr by STP-1 catalyst.                                         | <b>S9</b>  |
| <b>Fig. S10</b> | GC-FID data of styrene oxidation reaction mixture after 10 h by STP-1 catalyst with O <sub>2</sub> used as an oxidant. | <b>S9</b>  |
| <b>Fig. S11</b> | GC-FID data of styrene oxidation reaction mixture after 10 h by SP-1 catalyst by H <sub>2</sub> O <sub>2</sub> .       | <b>S10</b> |

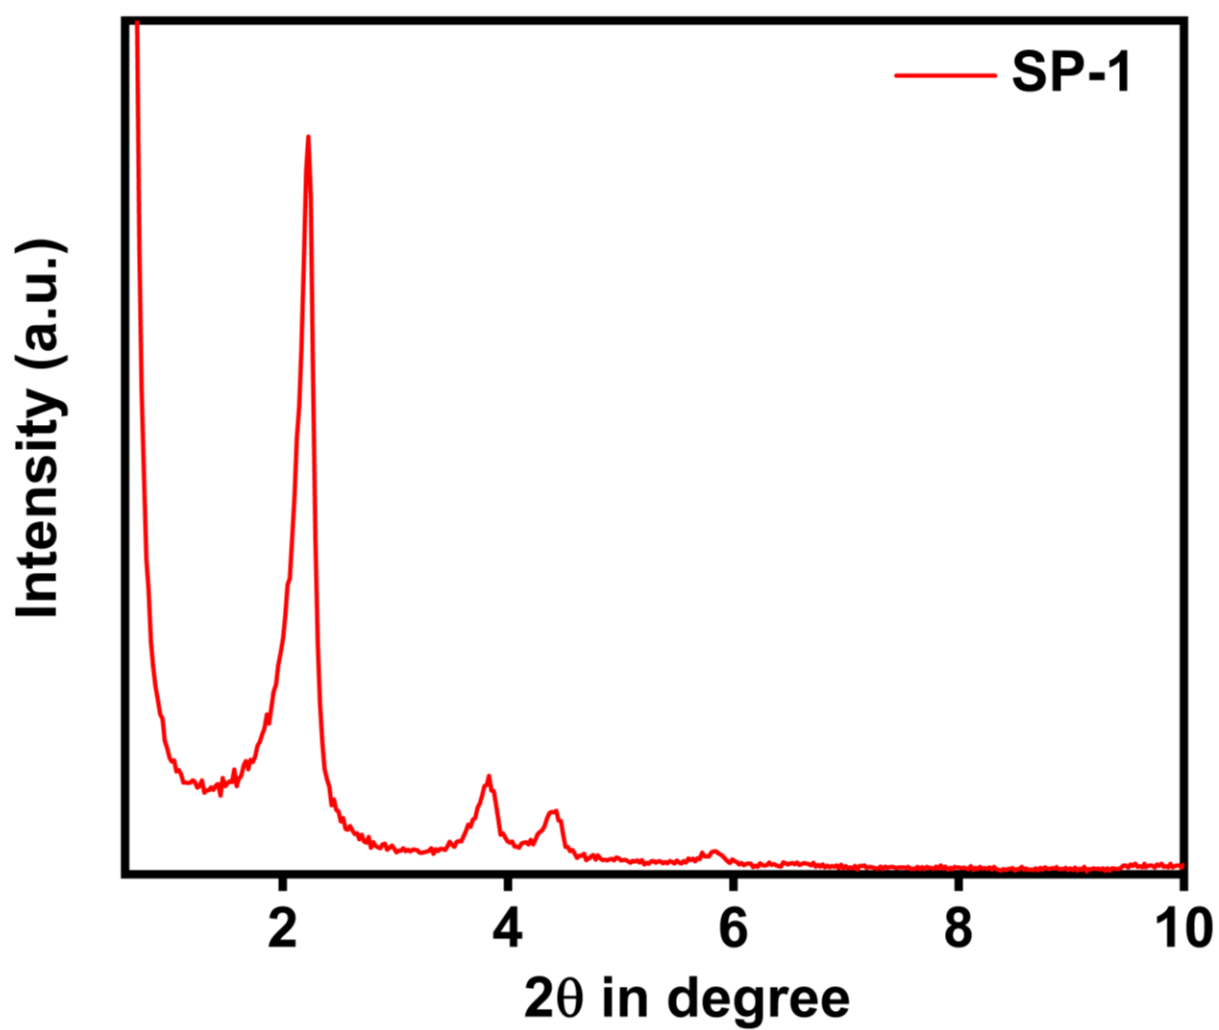

**Fig-S1:** Small angle powder XRD data of SP-1.

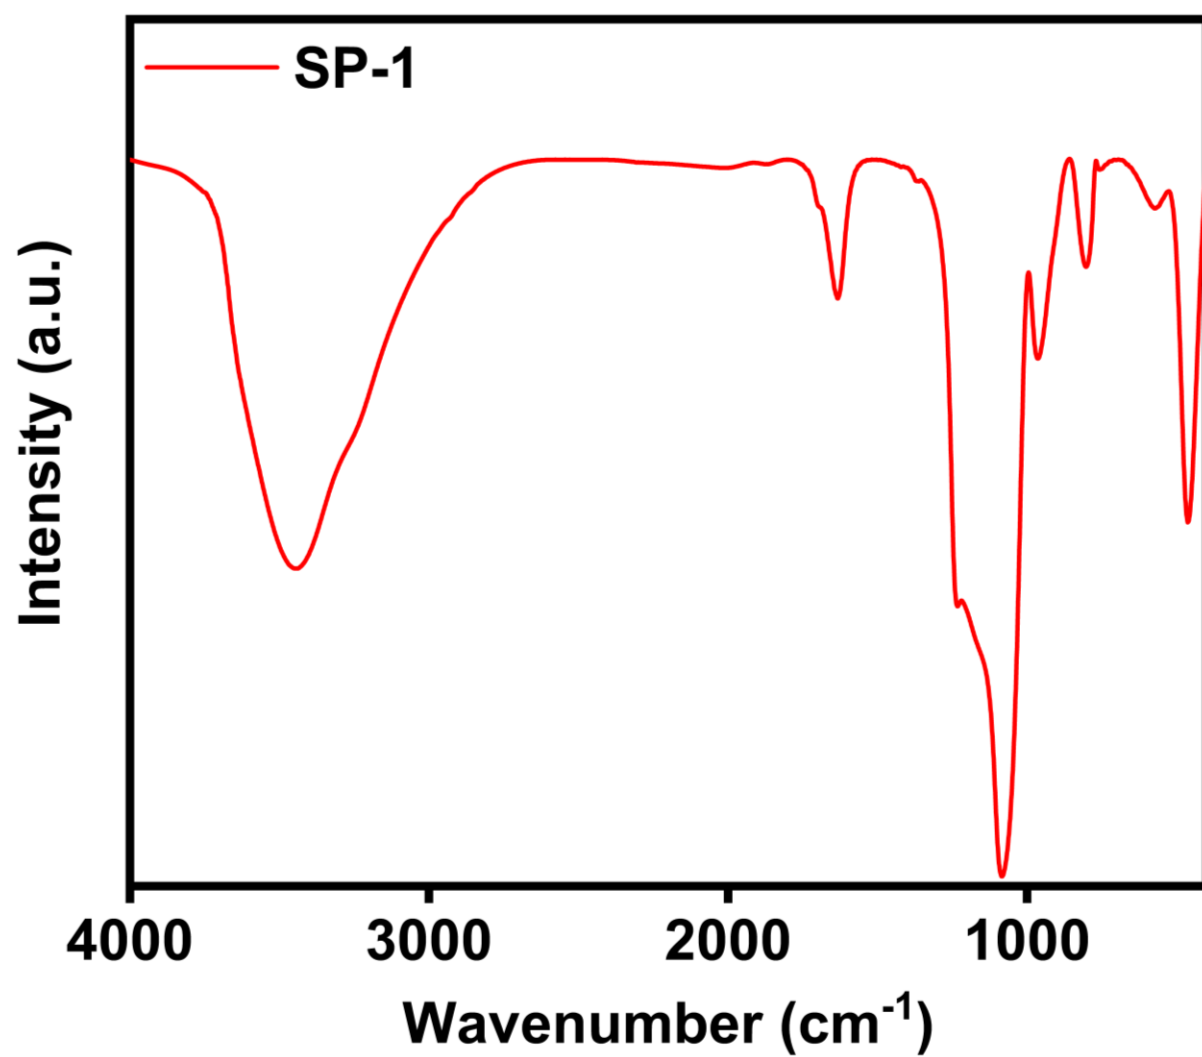

**Fig-S2:** FT-IR spectra of SP-1.

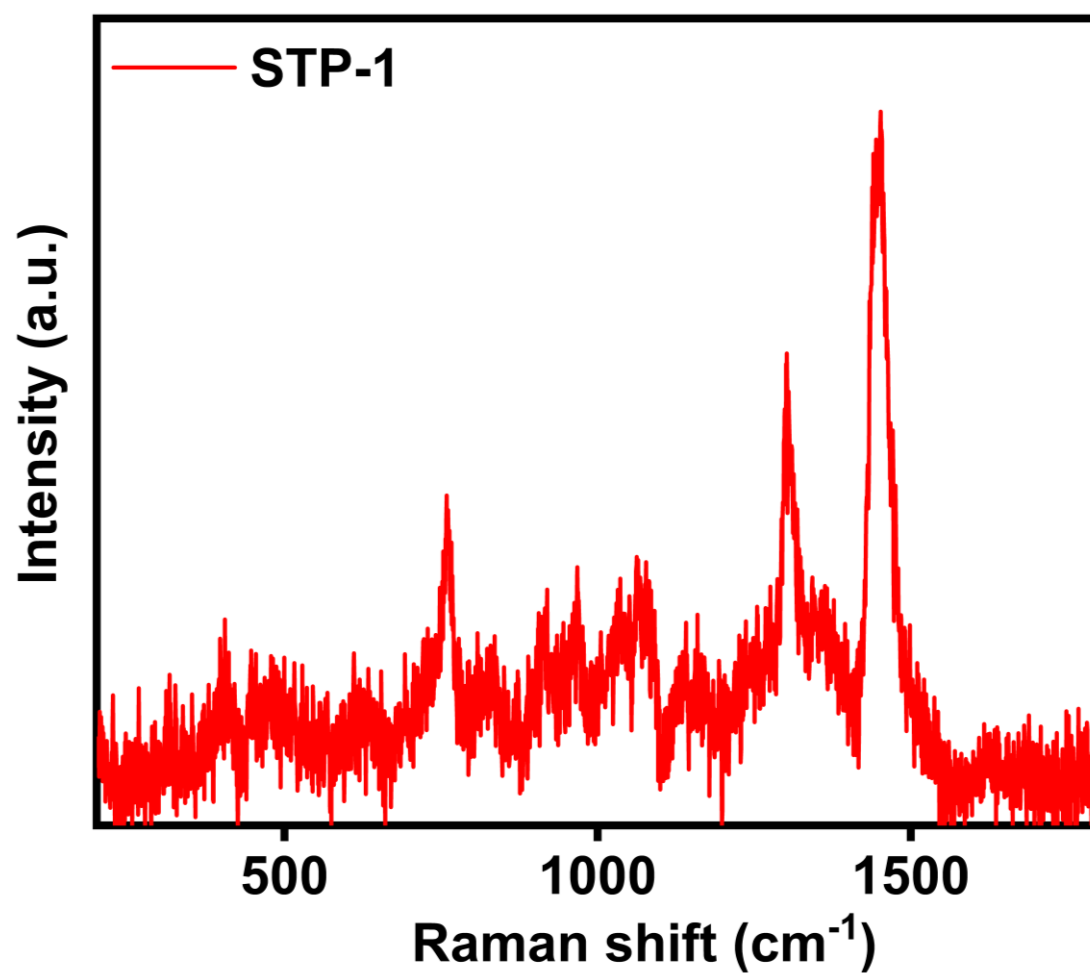

**Fig-S3:** Raman spectra of STP-1 sample.

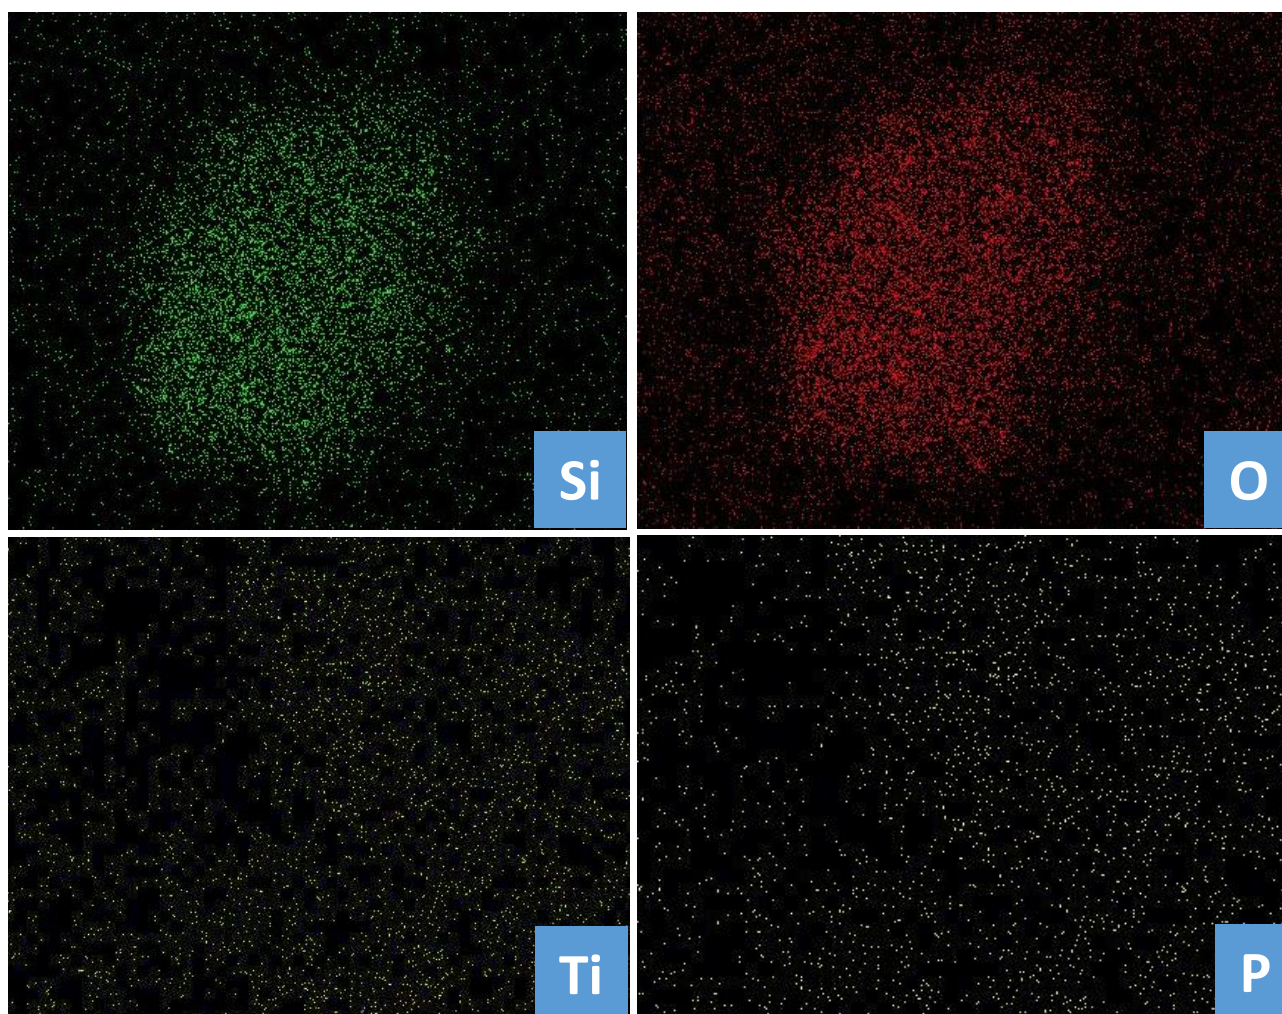

**Fig-S4:** Mapping of Si, O, Ti and P in STP-1 sample.

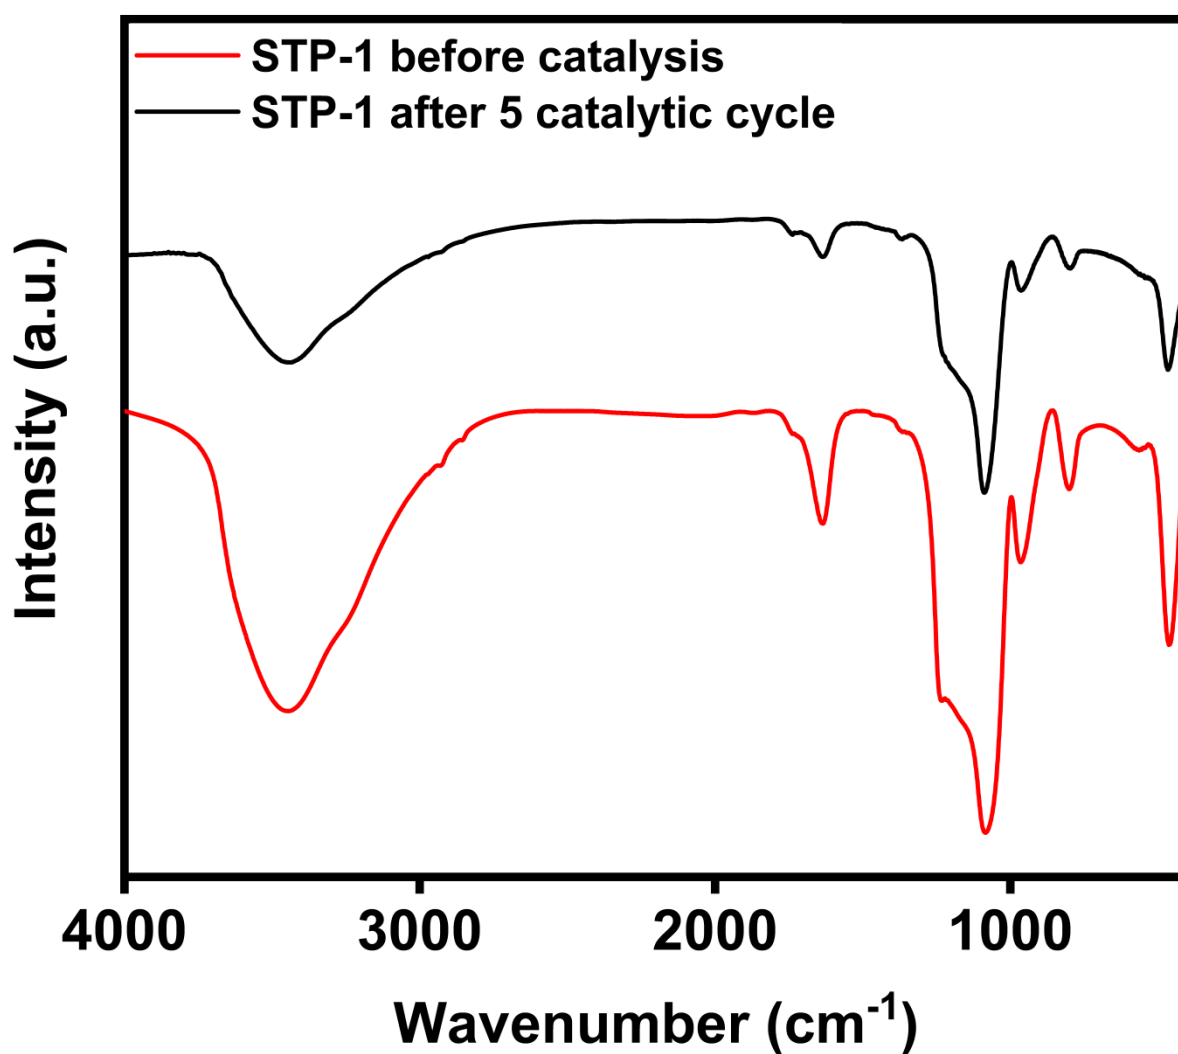

**Fig-S5:** FT-IR spectra of STP-1 catalyst after 5 catalytic cycles.

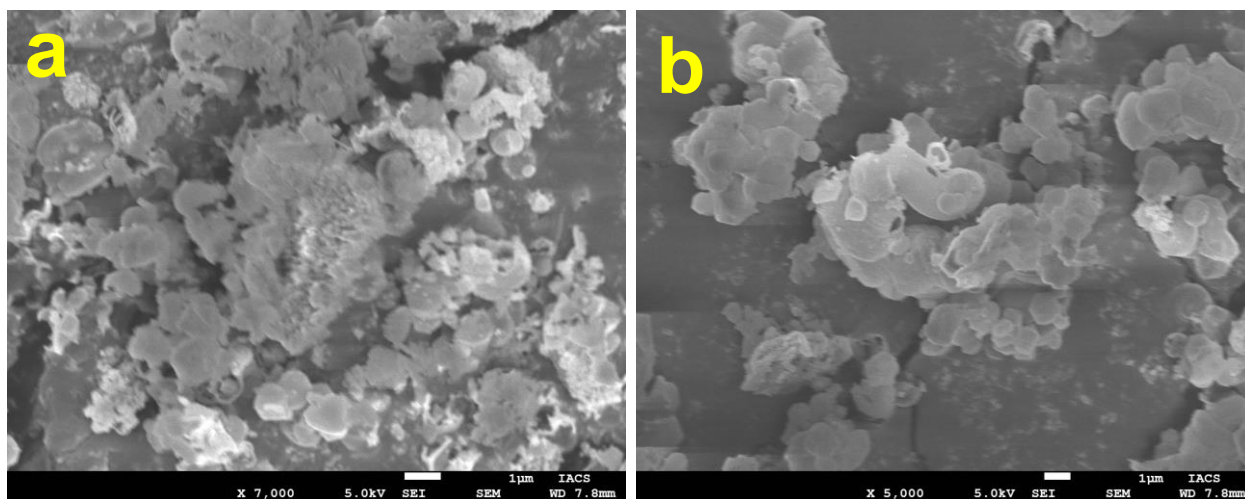

**Fig-S6:** FESEM images of recovered STP-1 catalyst after five catalytic cycles.

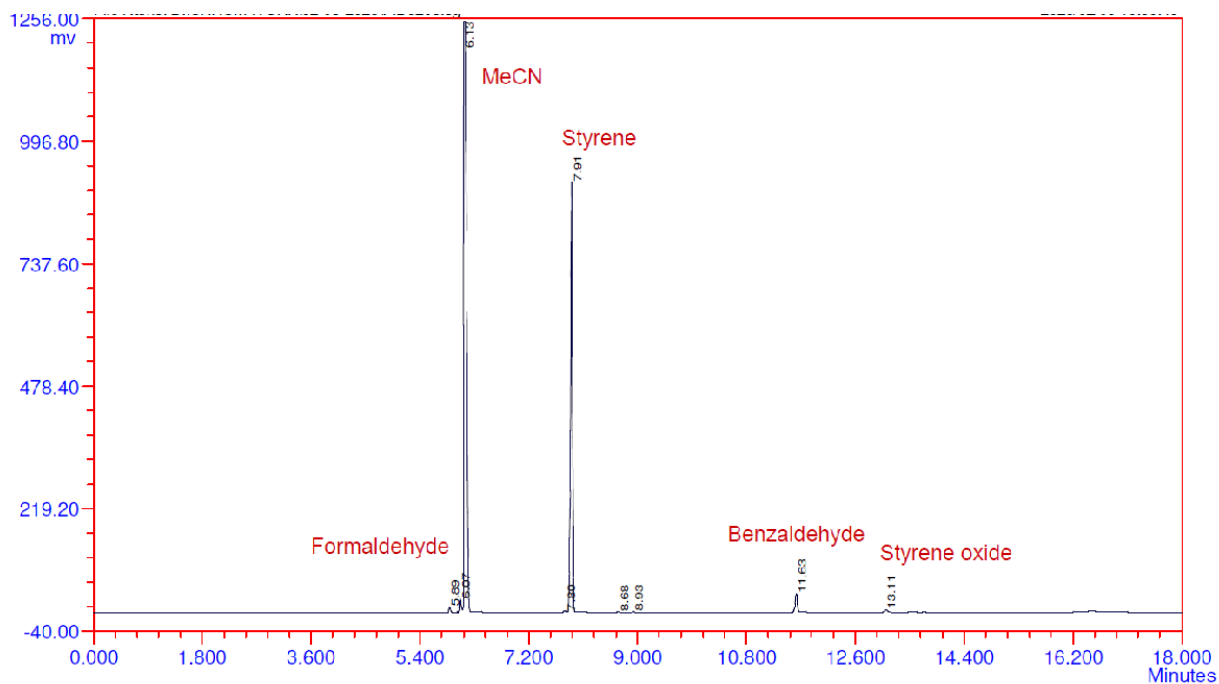

**Fig-S7:** GC-FID data of styrene oxidation reaction mixture after 1hr by STP-1 catalyst.

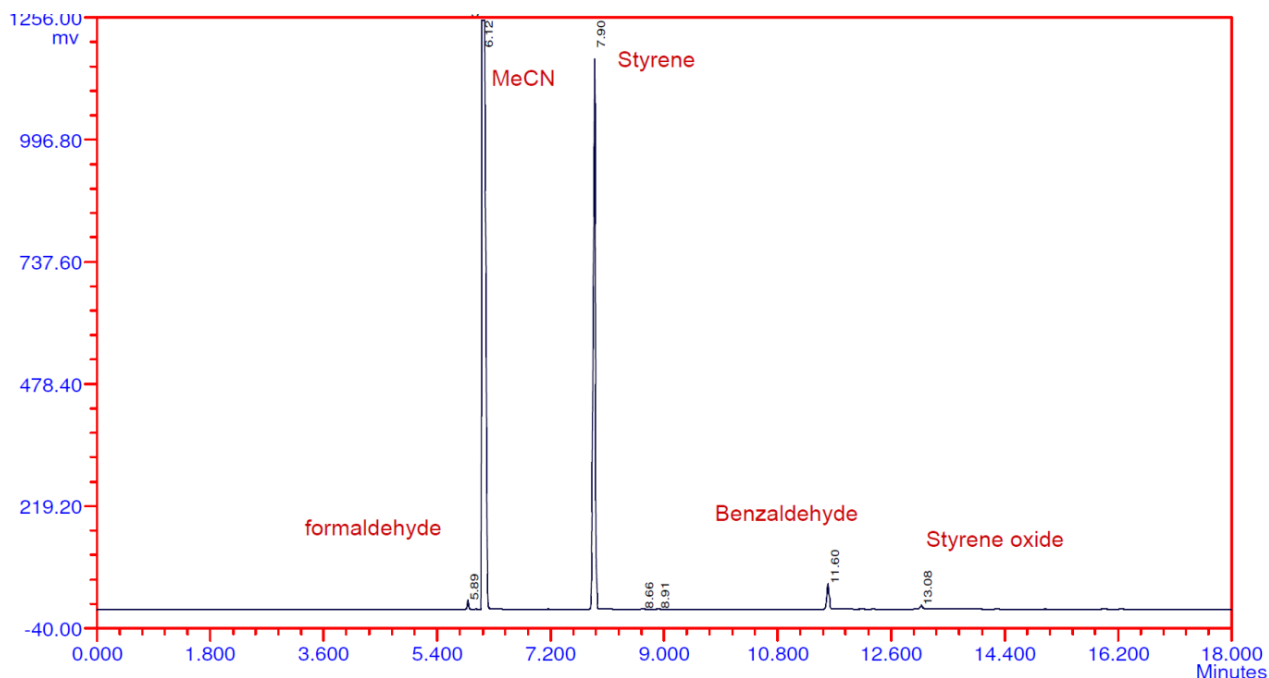

**Fig-S8:** GC-FID data of styrene oxidation reaction mixture after 2hr by STP-1 catalyst.

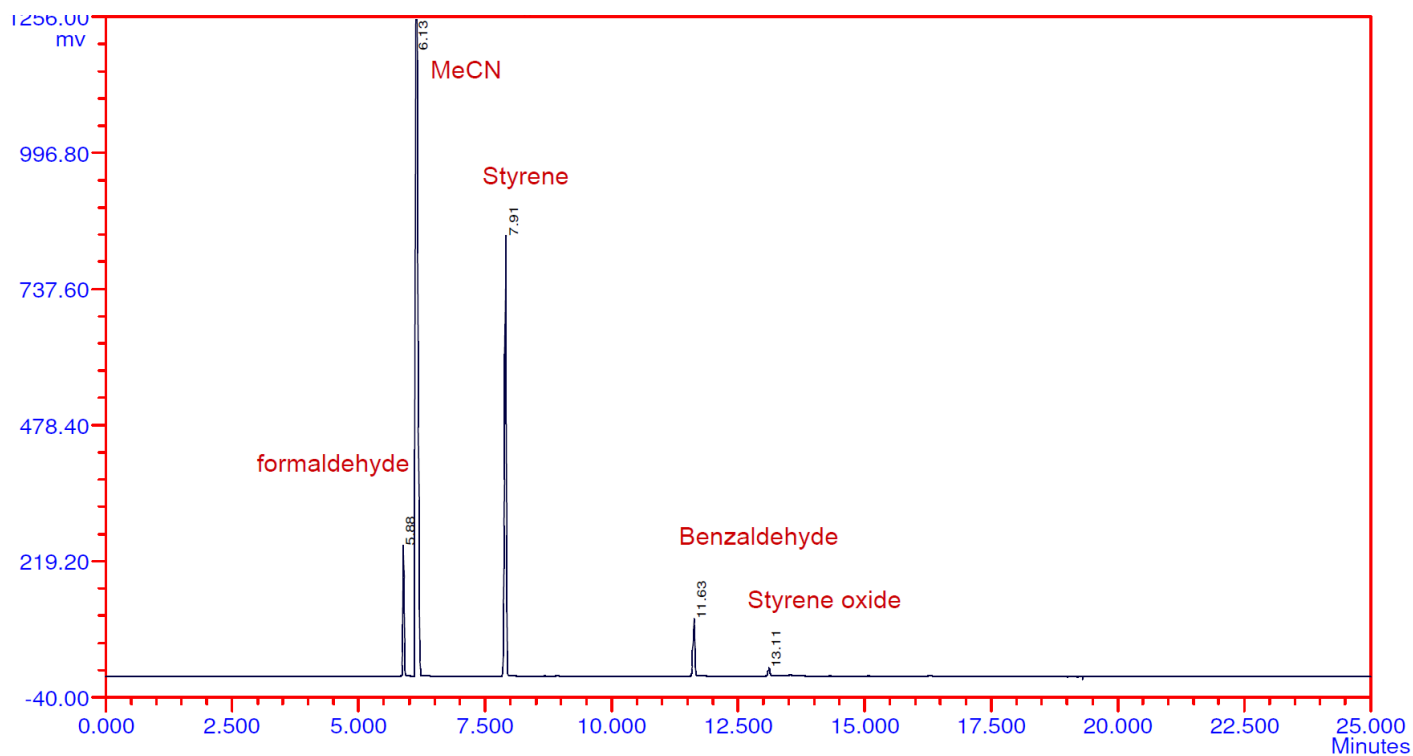

**Fig-S9:** GC-FID data of styrene oxidation reaction mixture after 5hr by STP-1 catalyst.

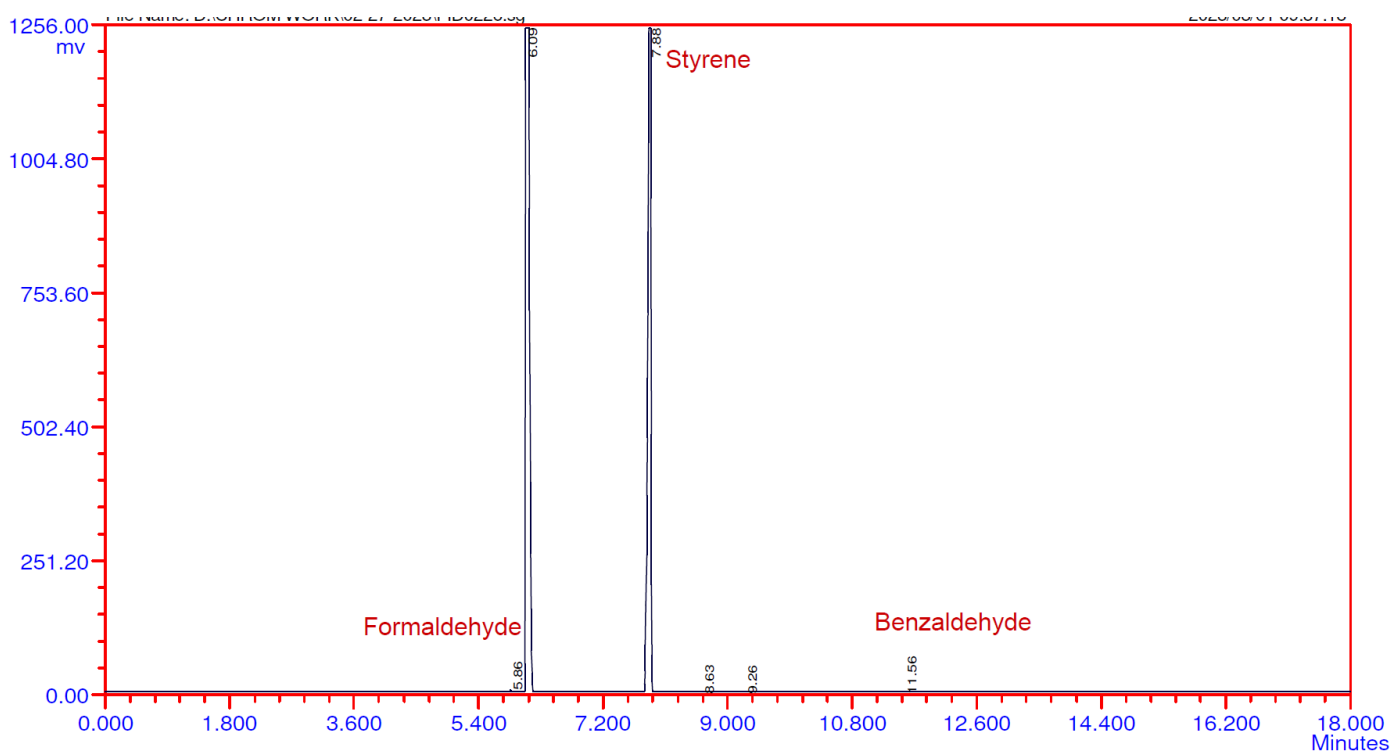

**Fig-S10:** GC-FID data of styrene oxidation reaction mixture after 10 h by STP-1 catalyst with  $O_2$  used as an oxidant.

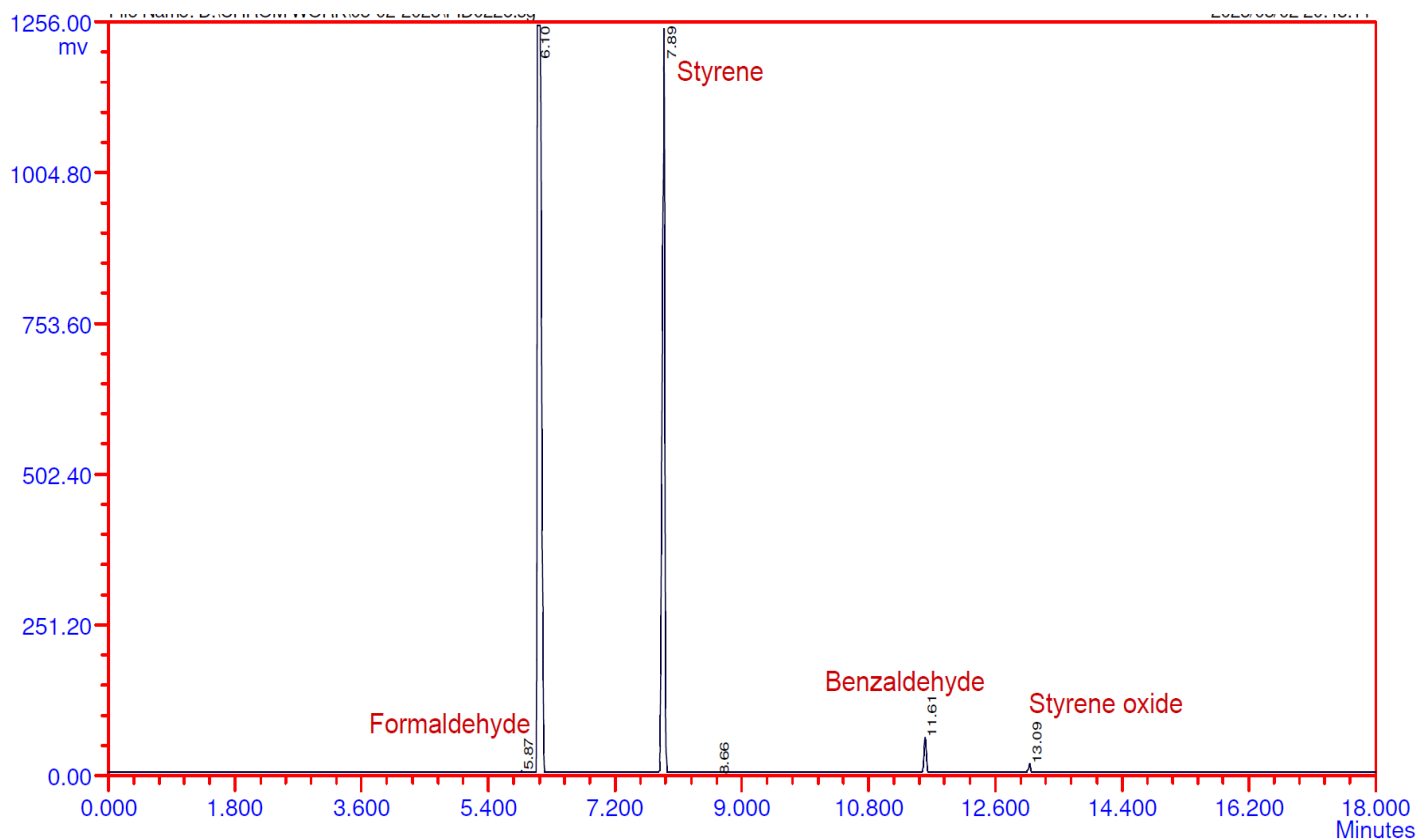

**Fig-S11:** GC-FID data of styrene oxidation reaction mixture after 10 h by SP-1 catalyst by  $\text{H}_2\text{O}_2$ .
